# Supplementary material
Source: Springer Nature journal article supplement (https://www.springermedizin.de/resource/supplementary/12889_2007_1245_MOESM1_ESM.pdf/9502772)

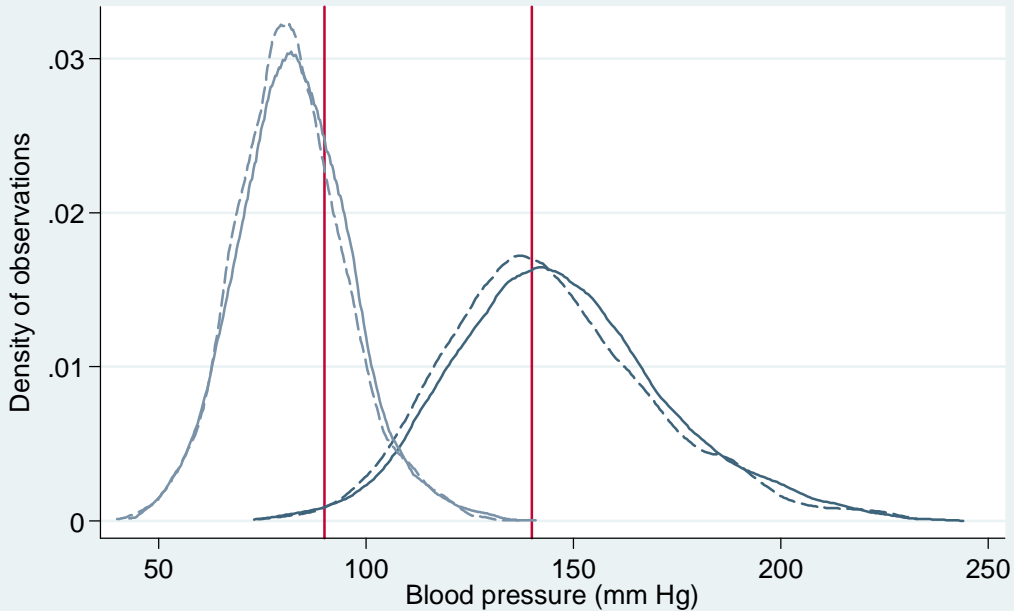

|            |   |             |       |             |
|------------|---|-------------|-------|-------------|
| Systolic:  | — | 1st Measure | - - - | 2nd Measure |
| Diastolic: | — | 1st Measure | - - - | 2nd Measure |

Supplement: MOESM1 [file 9502772]
